# Supplementary material for: ZAP’s stress granule localization is correlated with its antiviral activity and induced by virus replication
Source: PLoS Pathog. 2019 May 22;15(5):e1007798. doi: 10.1371/journal.ppat.1007798 (PMC6548403; doi:10.1371/journal.ppat.1007798)
Supplement: S2 Appendix — The smFISH results from 32 individual fields examined at 24 hpi as described in Figs 4 and S4. Each position was first analyzed for ZAP localization, then for smFISH and nsP3 signals. (XLSX) [file ppat.1007798.s002.xlsx]

## Sheet: Sheet1
Image Position	ZAP SG Localization	XY Position of ZAP Localization	Z Frame(s) of SG Localization	Detection of Virus Products	XY Position of Virus Products	Z Frame(s) of Virus Products	NSP3 Observed?
1	Null	Null	Null	Null	Null	Null	Null
2	Null	Null	Null	Null	Null	Null	Null
3	Null	Null	Null	Null	Null	Null	Null
4	Null	Null	Null	Null	Null	Null	Null
5	1 cell observed	(103, 33); (100, 40); (92, 30)	25-38	Single Dots!	(101, 30); (103, 30)	22	Nothing obvious
6	Null	Null	Null	Null	Null	Null	Null
7	2 cells observed			High-level replication
8	Null	Null	Null	Null	Null	Null	Null
9	Null	Null	Null	Null	Null	Null	Null
10	3 cells observed	(59, 28); (72, 33); (58, 46); (47, 64); (52, 26); (66, 72)	16-45	Low level replication with small complexes and some dots	Too many to count	Too many to count	Low levels
11	1 Cell observed	(70, 58); (74, 65); (71, 64)	26-41	On border, high level, in cell, single dots	Too many to count	24-49	Low levels
12	1 Cell observed	(35,62); (27,69)	24-56	Single Dots!	(42,68)	39	Nothing obvious
13	1 cell observed	(73,80); (61,99)	22-52	Single Dots!	(61,100); (71,93)	20	Nothing obvious
14	Null	Null	Null	Null	Null	Null	Null
15	Null	Null	Null	Null	Null	Null	Null
16	1 cell observed	(104,44); (86,24)	21-40	No Detectectable Virus…	Null	Null	Null
17	2 Cells observed	(67,86); (66,88); (55,88)	52-75	Single Dots!	(54,90); (47,72)*	58,49*	Nothing obvious
					*Cell doesn't show ZAP localization
18	1 Cell observered	(55,82)	32-42	High-level replication
19	Null	Null	Null	Null	Null	Null	Null
20	Null	Null	Null	Null	Null	Null	Null
21	1 cell observed			High-level Replication
22	1 cell observed	(13,58); (13,55); (21,43)	30-45	Single Dots!	(25,52)	39	Nothing obvious
	1 cell infected but no ZAP localization was obvious				(27,63)	36
23	2 cells observed	(27,27)*; (96,15)**; (105,20)**; (103,19)**	48-60*; 40-60**	Single Dots! (some suspect)	(26,27)*;	55*; 61**; 45**	Nothing obvious
					*Spot is a bit suspect	**Spots localize with ZAP
24	1 Cell Observed	(94, 106)	35-44	High-level replication
25	Null	Null	Null	Null	Null	Null	Null
26	1 cell observed	(68, 94); (75, 93); (76, 95); (76, 88)	20-51	Single Dots!	(62,93); (74, 97)	44, 47	Nothing obvious
27	1 Cell observed	No obvious granules		Single Dot!	(65,52)	28	Nothing obvious
28	Null	Null	Null	Null	Null	Null	Null
29	3 cells observed	Hard to see if there is any virus
30	Null	Null	Null	Null	Null	Null	Null
31	Null	Null	Null	Null	Null	Null	Null
32	2 cells observed	(105,68)	31-42	Single Dots!	(106,70)	36	Nothing obvious
		(18, 40); (8, 34)	17-34	Single Dots!	(20,32); (21,26)	29, 29	Low level!
